# Supplementary material for: Aging-In-Place Preference and Institutionalization Among Japanese Older Adults: A 7-Year Longitudinal Study
Source: Research Square preprint supplement (doi:10.21203/rs.3.rs-860695/v1), 2021-09-02
Supplement: Supplementary file 2 [file 774271f9ff9db11842ebbf94.docx]

**Table S2.** Descriptive statistics of the imputed samples for the incomplete variables.

| Variables | Number of missing values | *M* (*SD*) |
| --- | --- | --- |
| Education | 22 | 0.48 (0.67) |
| Perceived financial status | 100 | 2.70 (1.00) |
| Physical function | 13 | 38.93 (3.87) |
| Cognitive function | 290 | 7.73 (1.38) |

The values were calculated based on pooled data over 30 imputations.

Please see Table 1 for the descriptive statistics of the observed sample.
